# Supplementary material
Source: HighWire-hosted journal article supplement (https://rc.rcjournal.com/highwire/filestream/25872/field_highwire_adjunct_files/0/Supplemental_Figure_1.pdf)
Supplement: Supplemental_Figure_1.pdf [file Supplemental_Figure_1.pdf]

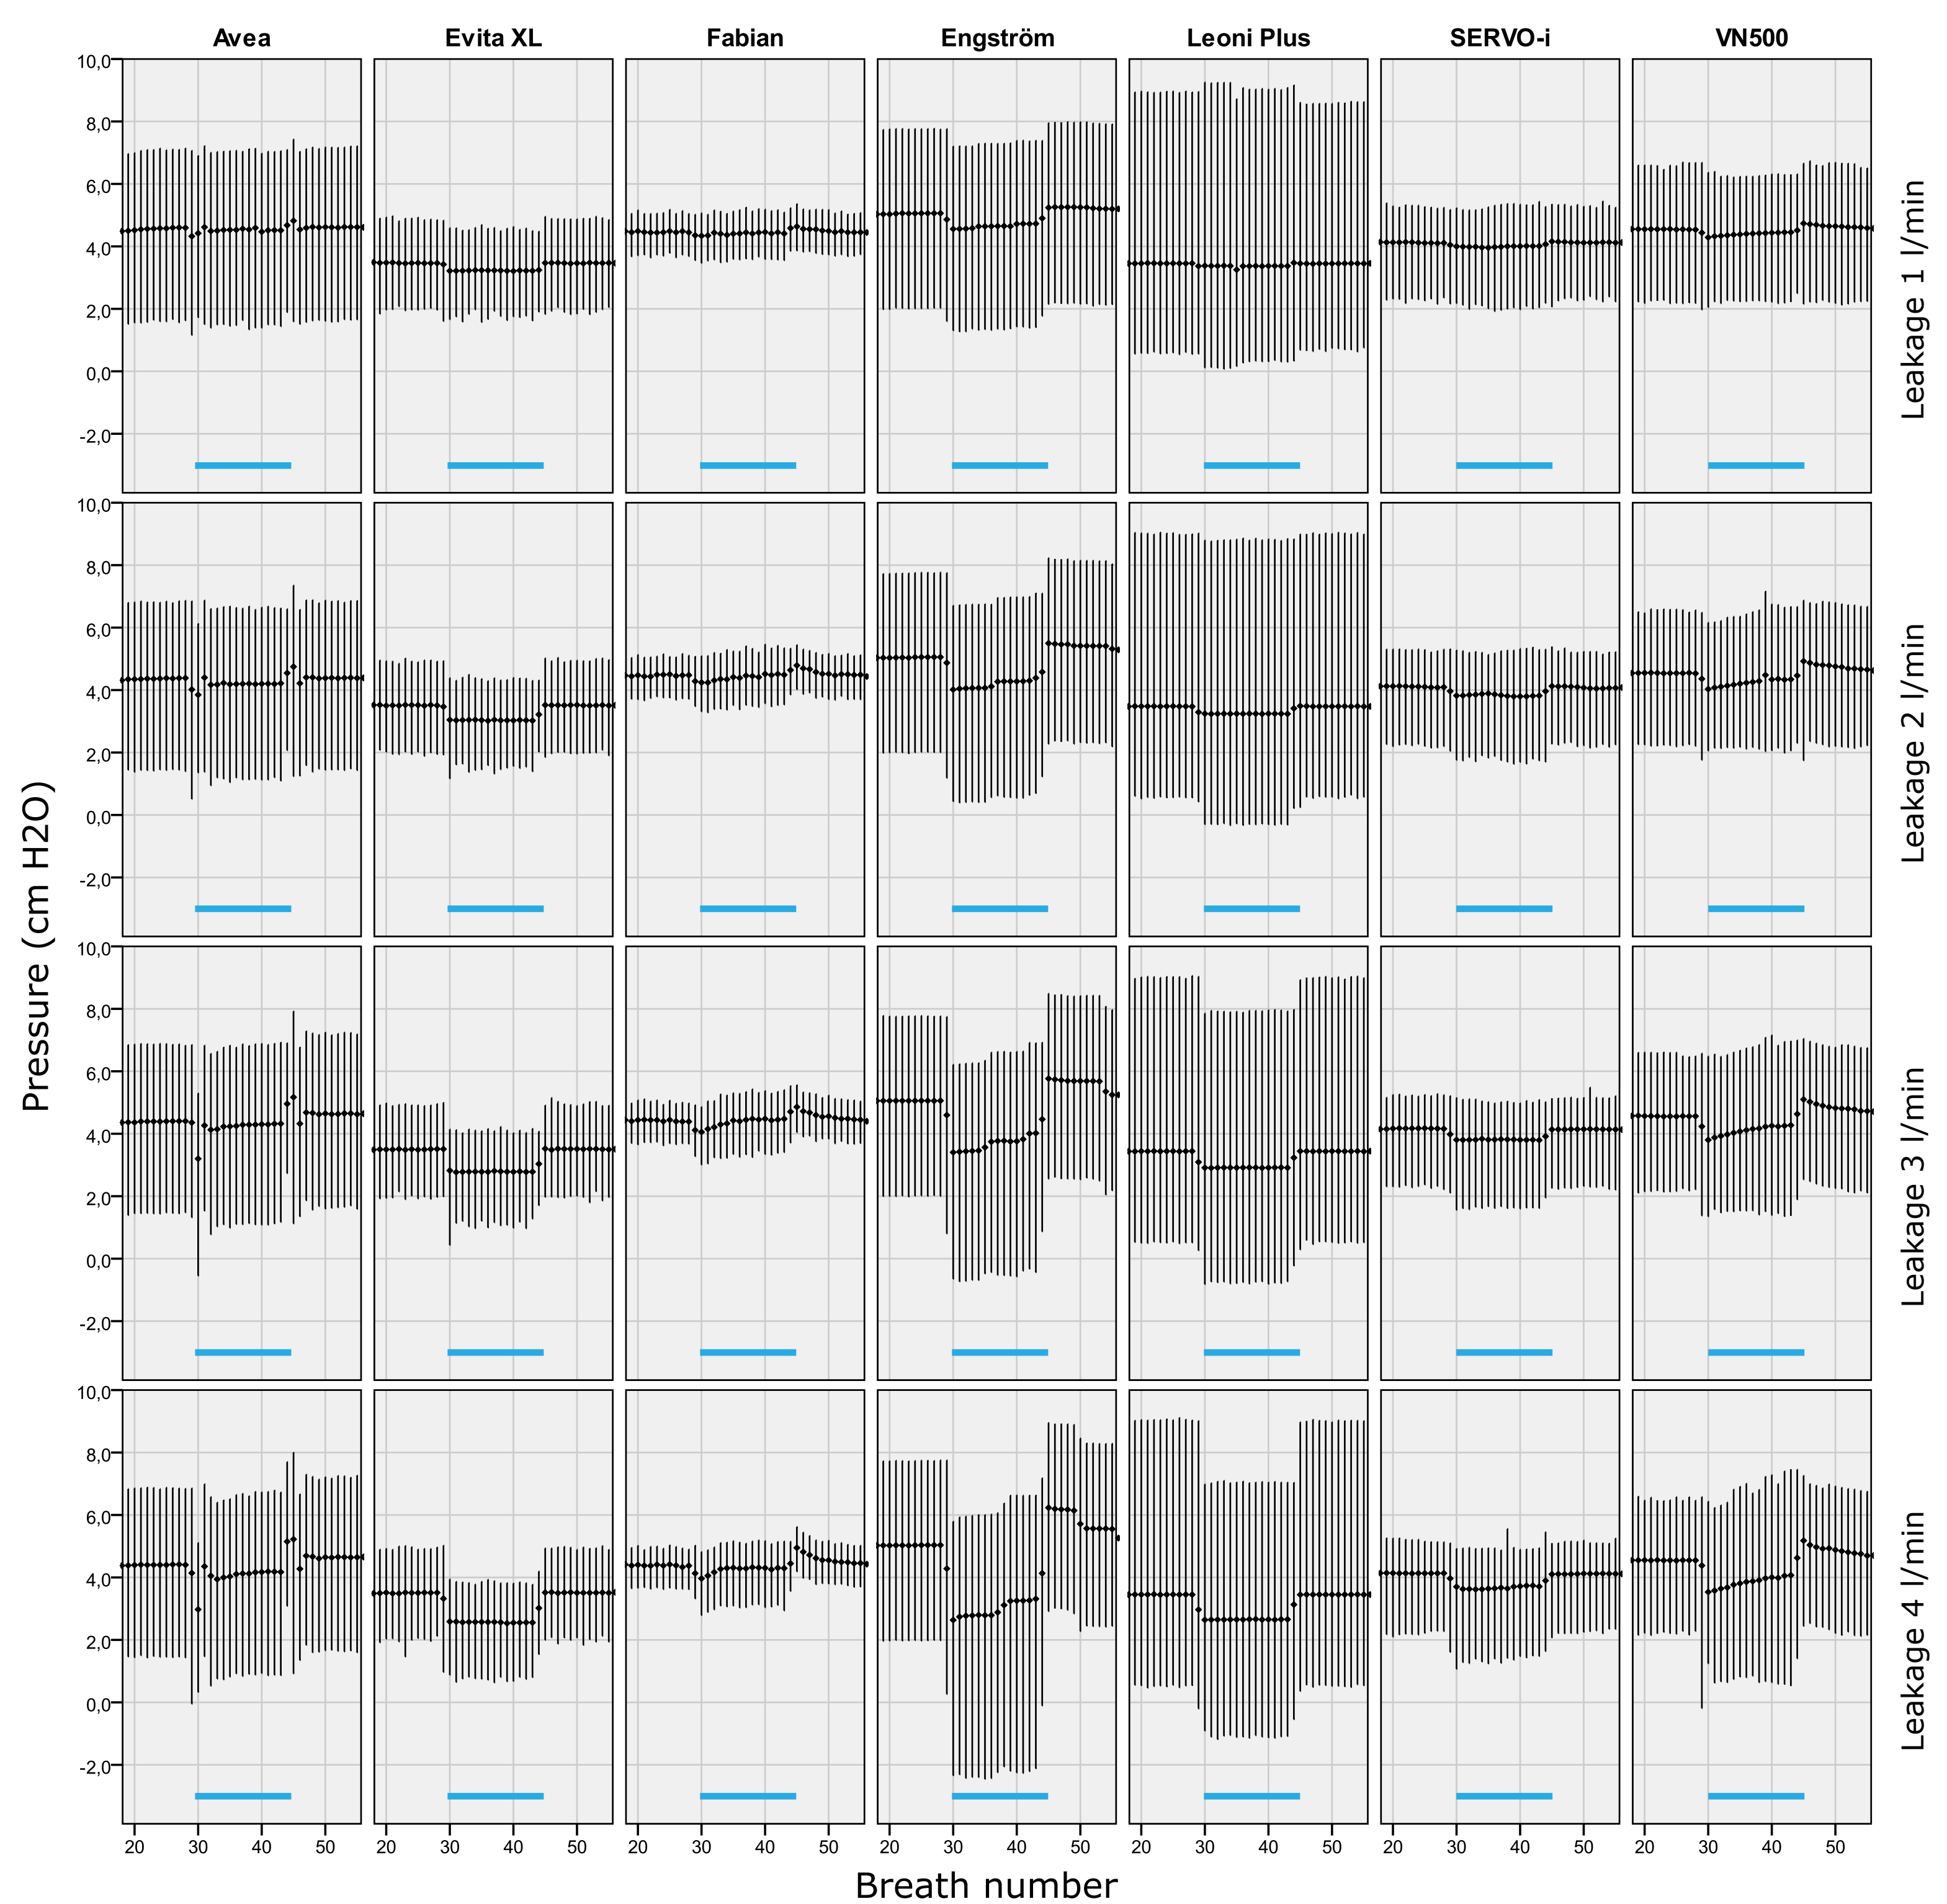

Supplemental digital content Figure 1: Pressure response for systems during leakage. Pressure change during constant leakage (1-4 l/min) applied between breath number 30 and 45 (blue bar) at a set CPAP of 4 cm H<sub>2</sub>O. Amplitude of pressure swings represents highest and lowest pressure for each breath. Delivered mean CPAP indicated by black diamonds.
